# Supplementary material for: Benzoquinoline-based fluoranthene derivatives as electron transport materials for solution-processed red phosphorescent organic light-emitting diodes
Source: Royal Society of Chemistry journal article supplement (doi:10.1039/c7ra03178e), 2017-01-01
Supplement: c7ra03178e1.pdf [file c7ra03178e1.pdf]

Electronic Supplementary Information

## **Benzoquinoline-based fluoranthene derivative as an electron transport material for solution-processed red phosphorescent organic light-emitting diodes**

So-Ra Park,<sup>a</sup> Dong Heon Shin,<sup>a</sup> Sang-Mi Park<sup>b</sup> and Min Chul Suh<sup>\*a</sup>

<sup>a</sup> Organic Electronic Materials Laboratory, Department of Information Display,  
Kyung Hee University, Dongdaemoon-Gu, Seoul 02447, Republic of Korea.

<sup>b</sup> R&D Center OLED Team, AlphaChem, 145, Dongo 1-Gil, Hwaseong-Si, Gyeonggi-Do 18298,  
Republic of Korea

Tel.: +82-2-961-0694, E-mail: [mcsuh@khu.ac.kr](mailto:mcsuh@khu.ac.kr)

**SAMPLE INFORMATION**

|                   |               |                     |                           |
|-------------------|---------------|---------------------|---------------------------|
| Sample Name:      | FRT-PBQ       | Acquired By:        | System                    |
| Sample Type:      | Unknown       | Date Acquired:      | 5/10/2017 12:53:59 PM KST |
| Vial:             | 12            | Acq. Method Set:    | HPLC MeOH                 |
| Injection #:      | 1             | Date Processed:     | 5/10/2017 4:18:25 PM KST  |
| Injection Volume: | 5.00 ul       | Processing Method:  | QC PM                     |
| Run Time:         | 150.0 Minutes | Channel Name:       | 240.0nm                   |
| Sample Set Name:  | APPG 087      | Proc. Chnl. Descr.: | PDA 240.0 nm              |

**Auto-Scaled Chromatogram**

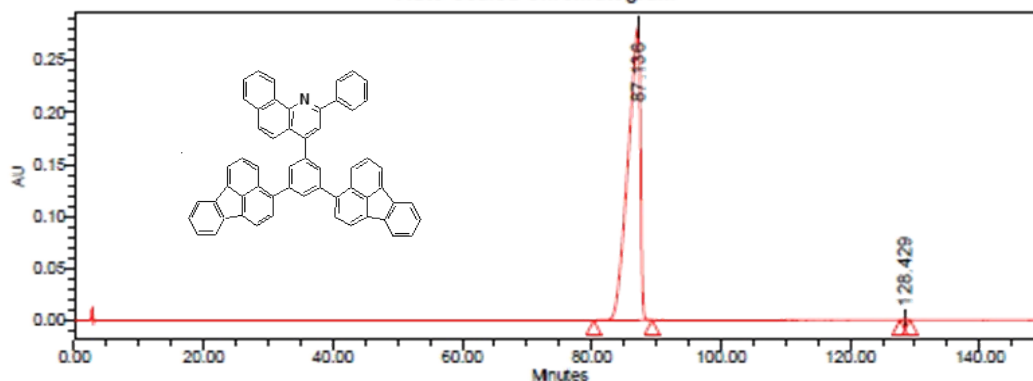

**Peak Results**

| Name | RT      | % Height | Height | Width (sec) | Area     | % Area |
|------|---------|----------|--------|-------------|----------|--------|
| 1    | 87.136  | 99.97    | 281865 | 542.000     | 37431909 | 99.99  |
| 2    | 128.429 | 0.03     | 82     | 95.000      | 4099     | 0.01   |

**Fig. S1. HPLC analysis of FRT-PBQ**

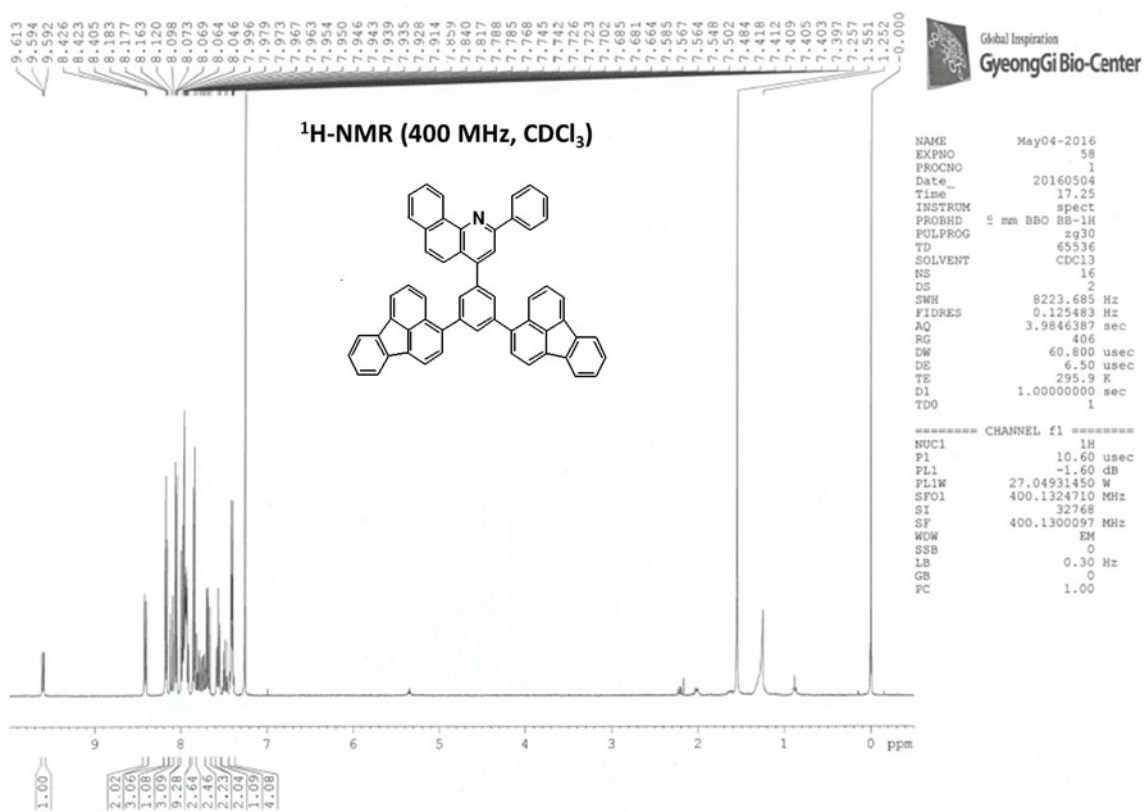

**Fig. S2. <sup>1</sup>H-NMR (400 MHz, CDCl<sub>3</sub>) spectra of FRT-PBQ**
